# Supplementary material for: Inhibition of Wild Enterobacter cloacae Biofilm Formation by Nanostructured Graphene- and Hexagonal Boron Nitride-Coated Surfaces
Source: PubMed Central journal article supplement (PMC6358881; doi:10.3390/nano9010049), 2019-01-02
Supplement: nanomaterials-09-00049-s001.pdf [file nanomaterials-09-00049-s001.pdf]

## Supplementary data

# Inhibition of Wild *Enterobacter cloacae* Biofilm Formation by Nanostructured Graphene- and Hexagonal Boron Nitride-Coated Surfaces

Elsie Zurob <sup>1,2</sup>, Geraldine Dennett <sup>1</sup>, Dana Gentil <sup>1</sup>, Francisco Montero-Silva <sup>1</sup>, Ulrike Gerber <sup>3</sup>, Pamela Naulín <sup>4</sup>, Andrea Gómez <sup>4</sup>, Raúl Fuentes <sup>5</sup>, Sheila Lascano <sup>6</sup>, Thiago Henrique Rodrigues da Cunha <sup>7</sup>, Cristian Ramírez <sup>8</sup>, Ricardo Henríquez <sup>9</sup>, Valeria del Campo <sup>9</sup>, Nelson Barrera <sup>4</sup>, Marcela Wilkens <sup>2</sup> and Carolina Parra <sup>1,\*</sup>

<sup>1</sup> Laboratorio Nanobiomateriales, Departamento de Física, Universidad Técnica Federico Santa María, Avenida España 1680, Valparaíso, Chile; elsie.zurob@usach.cl (E.Z.); g.dennett@gmail.com (G.D.); dana.gentil@usm.cl (D.G.); monroster@gmail.com (F.M.-S.)

<sup>2</sup> Laboratorio de Microbiología Básica y Aplicada, Universidad de Santiago de Chile, Avenida Libertador Bernardo O'Higgins 3363, Santiago, Chile; marcela.wilkens@usach.cl

<sup>3</sup> Faculty Environment and Natural Science, Institute of Biotechnology, Brandenburg University of Technology, Universitätsplatz 1, 01968 Senftenberg, Germany; gerberu@b-tu.de

<sup>4</sup> Facultad de Ciencias Biológicas, Pontificia Universidad Católica de Chile, Alameda 340, Santiago, Chile; pnaulin@uc.cl (P.N.); agomez@bio.puc.cl (A.G.); nbarrera@bio.puc.cl (N.B.)

<sup>5</sup> Departamento de Industrias, Universidad Técnica Federico Santa María, Avenida España 1680, Valparaíso, Chile; raul.fuentes@usm.cl

<sup>6</sup> Departamento de Mecánica, Universidad Técnica Federico Santa María, Avda. Vicuña Mackenna 3939, Santiago, Chile; sheila.lascano@usm.cl

<sup>7</sup> Departamento de Física, CTNanotubos, Universidade Federal de Minas Gerais, Belo Horizonte 31310260, Brazil; thiago.cunha@ctnano.com.br

<sup>8</sup> Departamento de Ingeniería Química y Ambiental, Universidad Técnica Federico Santa María, Avenida España 1680, Valparaíso, Chile; cristian.ramirez@usm.cl

<sup>9</sup> Departamento de Física, Universidad Técnica Federico Santa María, Avenida España 1680, Valparaíso, Chile; ricardo.henriquez@usm.cl (R.H.); valeria.delcampo@usm.cl (V.d.C.)

\* Correspondence: carolina.parra@usm.cl

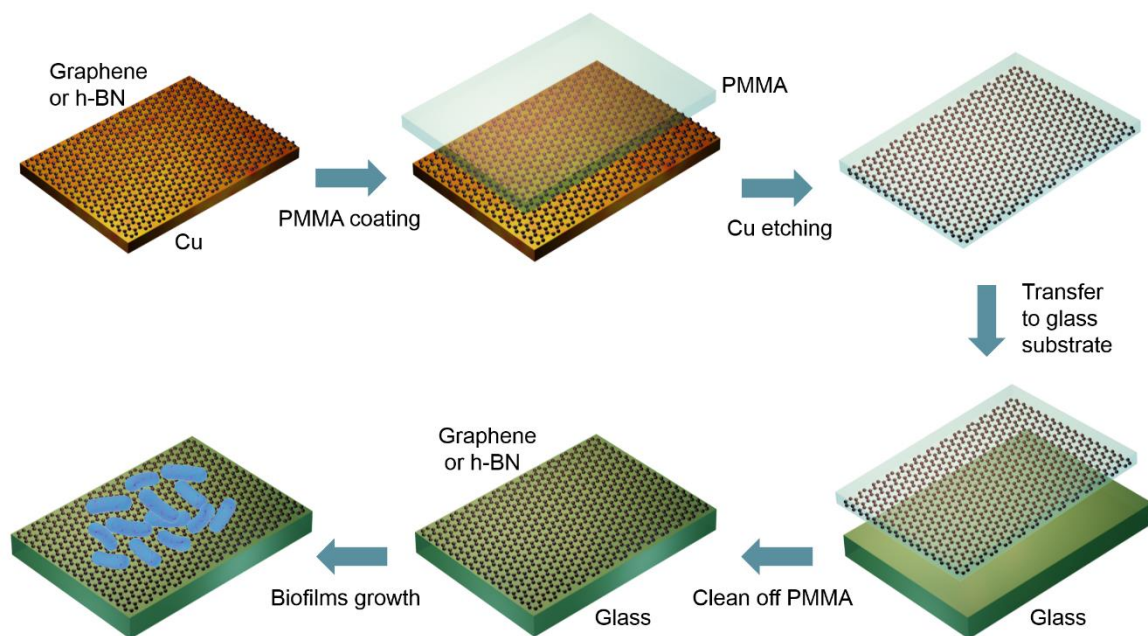

Figure S1. Illustrative diagram showing the PMMA-assisted transfer method used to obtain graphene- and h-BN-coated glass samples for the present study. A thin layer of PMMA (Polymethyl methacrylate) on graphene, on Cu (and h-BN on Cu) foil was produced by spin coating. The polymer provides a supportive framework for the two-dimensional (2D) coating before the transfer. The Cu substrate underneath was then etched away using an ammonium persulfate ((NH<sub>4</sub>)<sub>2</sub>SO<sub>8</sub>) solution. After the Cu foil was completely dissolved, the floating membrane was scooped and placed onto glass. After drying, the polymeric film was dissolved with acetone.

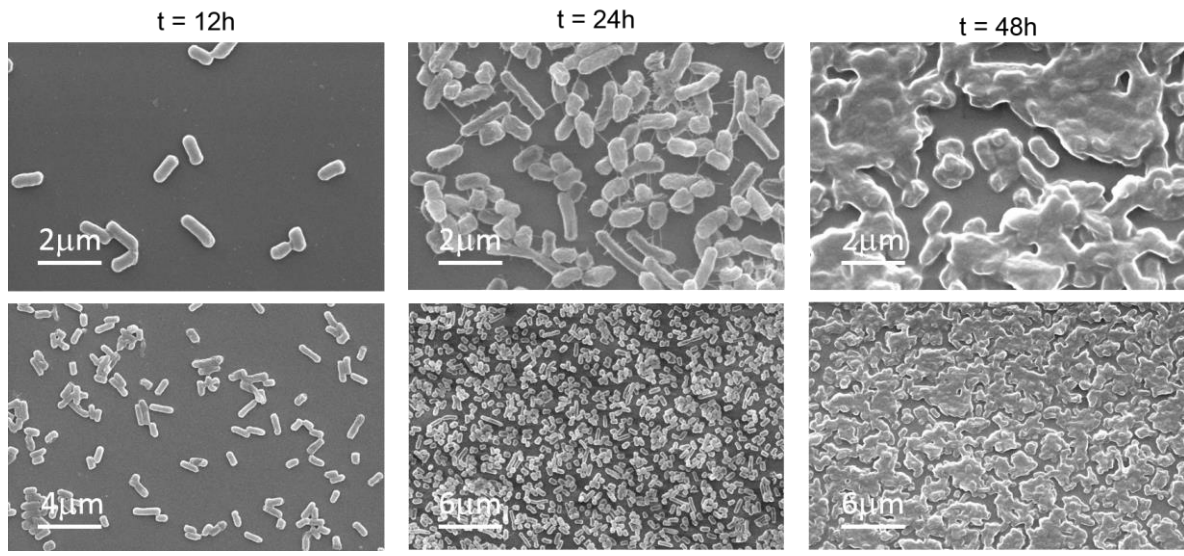

Figure S2. SEM image of *E. cloacae* after 12 h, 24h and 48h incubation on a glass surface. Reversible stage of biofilm formation can be observed by, first, the presence of bacteria adhered to the surface (12h) and then the production of filaments that assist a robust bacterial adhesion (24h). After 48 h incubation on a glass surface, the irreversible stage of biofilm growth is reached with bacteria encapsulated in exopolymeric substances (EPS).

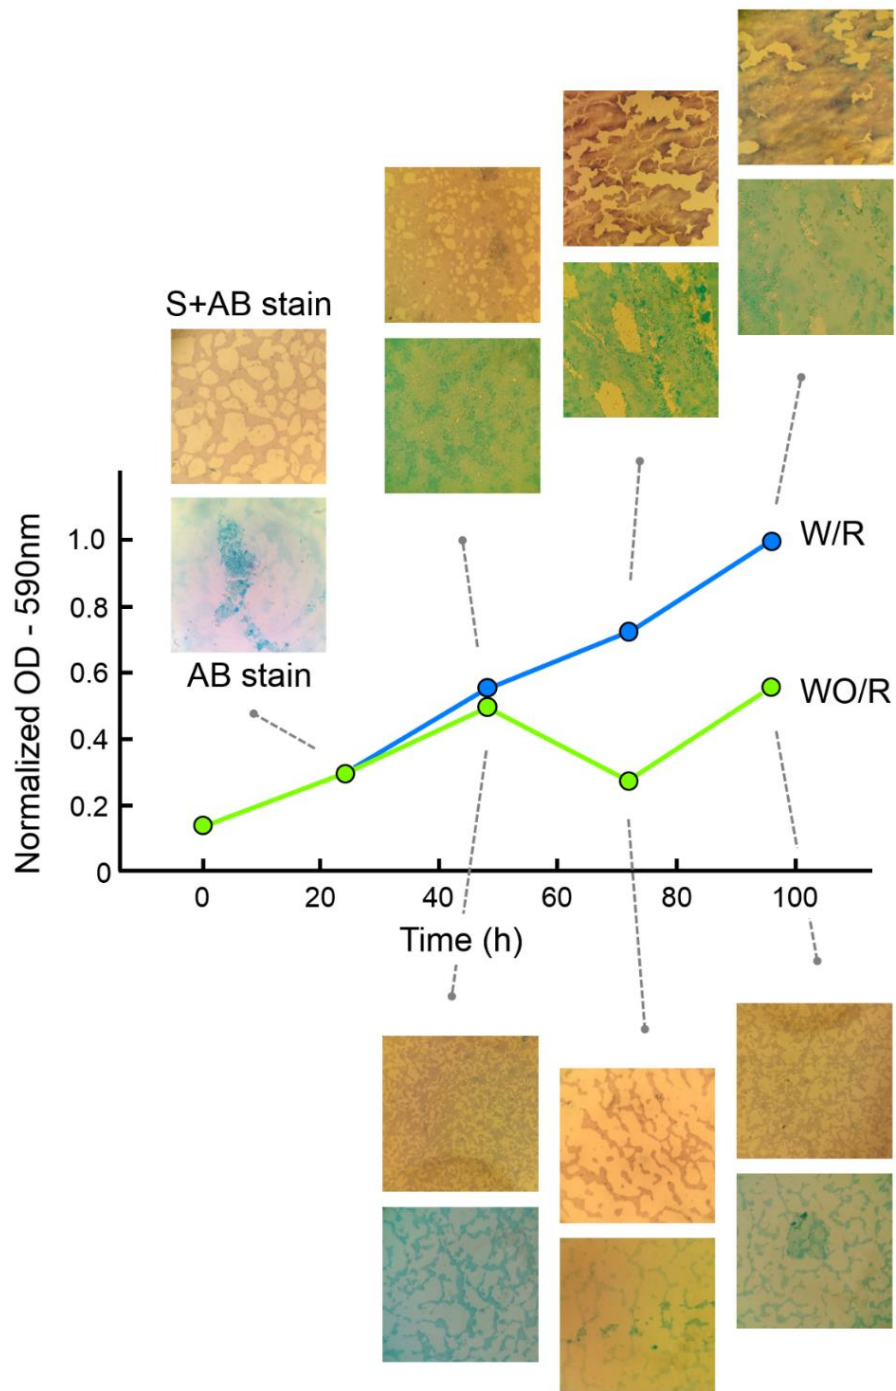

Figure S3. Optical density (OD) measurements and staining test of *E. cloacae* biofilms grown on glass as a function of time. The response of biofilms under no media replacement incubation conditions (WO/R) and media replacement incubation conditions (W/R) is depicted. Corresponding staining test for each time are included (WO/R and W/R).

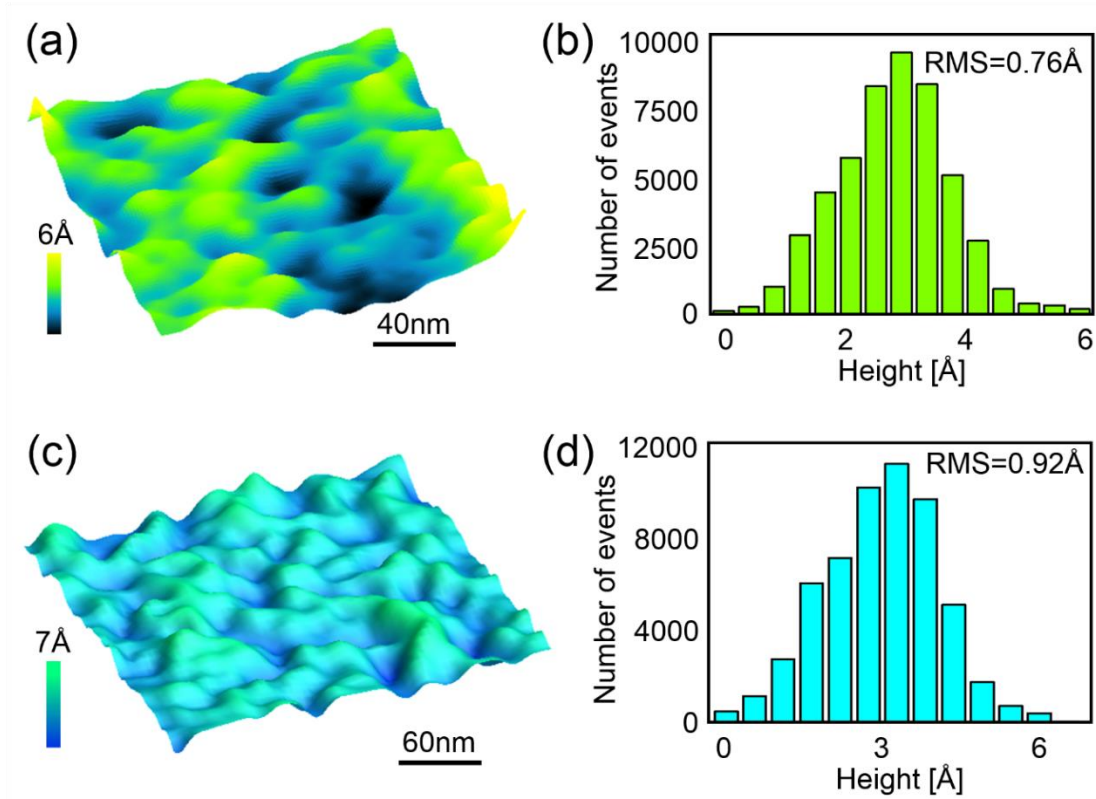

Figure S4. AFM image of graphene-coated glass sample (a) and h-BN-coated glass sample, (c) with their respective roughness analyses; (b) and (d).

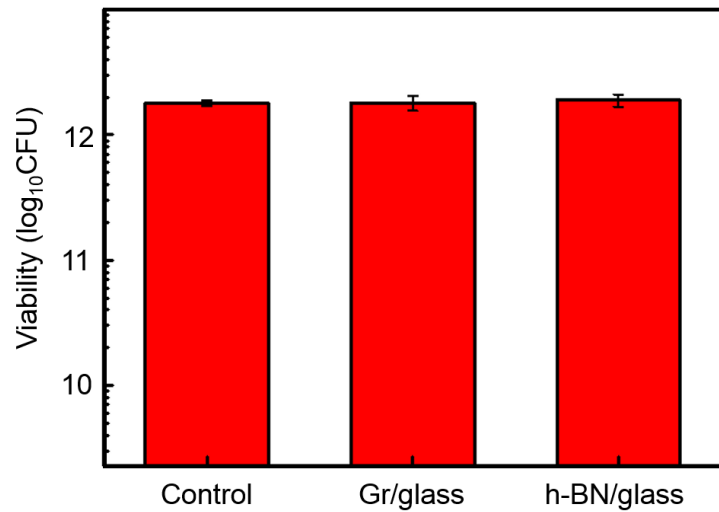

Figure S5. Cell viability of *E. cloacae* in planktonic state (not adhered) recovered after 48h exposure to graphene- and h-BN-coated glass.

Table S1. Morphological and biochemical test performed for strain identification of wild *Enterobacter cloacae*

| Test or characteristic         | Result                       |              |
|--------------------------------|------------------------------|--------------|
|                                | <i>E. cloacae</i> ATCC 13047 | Wild isolate |
| Gram stain reaction            | -                            | -            |
| Cell morphology                | Rod                          | Rod          |
| Motility                       | +                            | +            |
| Growth on MacConkey agar       | +                            | +            |
| Colonies                       | Pink                         | Pink         |
| Precipitation of bile salts    | -                            | -            |
| Lactose fermentation           | +                            | +            |
| Glucose                        | +                            | +            |
| Gas from glucose               | +                            | +            |
| Production of H <sub>2</sub> S | -                            | -            |
| Lysine decarboxylase           | -                            | -            |
| Ornithine decarboxylase        | +                            | +            |
| Simmons citrate                | +                            | +            |
| Indol                          | -                            | -            |
| Oxidase                        | -                            | -            |
| Catalase                       | +                            | +            |

+ = positive, - = negative
